# Supplementary material for: Characterization of Thermoresponsive Poly-N-Vinylcaprolactam Polymers for Biological Applications
Source: MDPI journal article supplement (doi:10.3390/polym13162639), 2021-08-08
Supplement: s1 [file s1]

Supporting information for

# Characterization of thermoresponsive poly-N-Vinylcaprolactam for biological applications

Lorenzo Marsili<sup>1,2,\*</sup>, Michele Dal Bo<sup>1</sup>, Giorgio Eisele<sup>3</sup>, Ivano Donati<sup>4</sup>, Federico Berti<sup>2</sup> and Giuseppe Toffoli<sup>5</sup>

<sup>1</sup> CRO National Cancer Institute; Via Franco Gallini 2, 33081 Aviano, Italy, [lorenzo.marsili@phd.units.it](mailto:lorenzo.marsili@phd.units.it), [mdalbo@cro.it](mailto:mdalbo@cro.it), [gtoffoli@cro.it](mailto:gtoffoli@cro.it)

<sup>2</sup> Department of Chemical and Pharmaceutical Sciences, University of Trieste, Via Licio Giorgieri 1, 34127 Trieste, Italy; [fberti@units.it](mailto:fberti@units.it)

<sup>3</sup> Ronzoni Institute; Via G. Colombo 81, 20133 Milano, Italy, [eisele@cat-rozoni.it](mailto:eisele@cat-rozoni.it)

<sup>4</sup> Department of Life Sciences, University of Trieste, Via Licio Giorgieri 5, 34127 Trieste, Italy; [idonati@units.it](mailto:idonati@units.it)

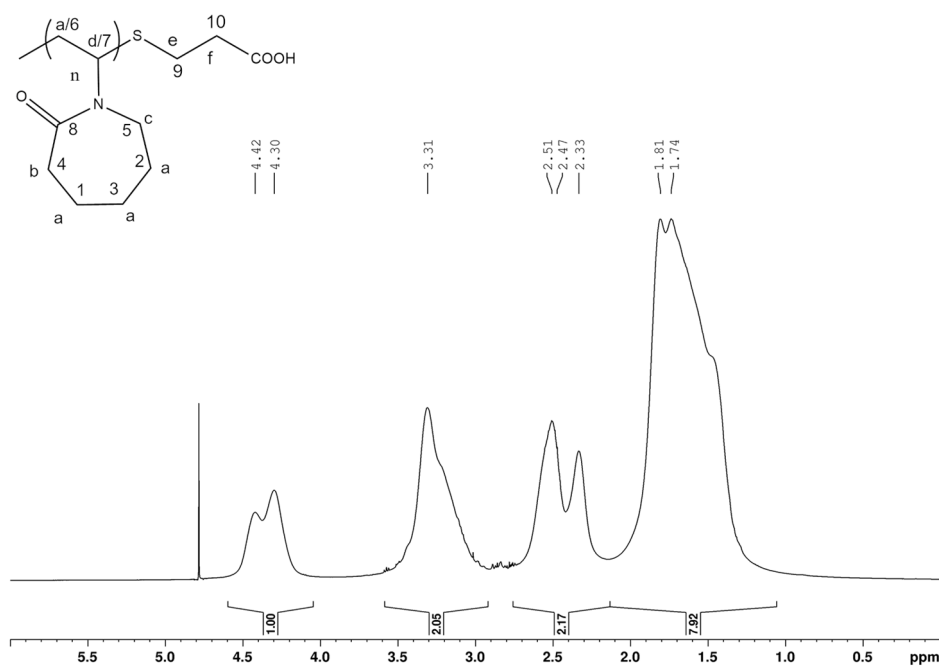

Figure S1 <sup>1</sup>H spectrum of PNVCL\_122.

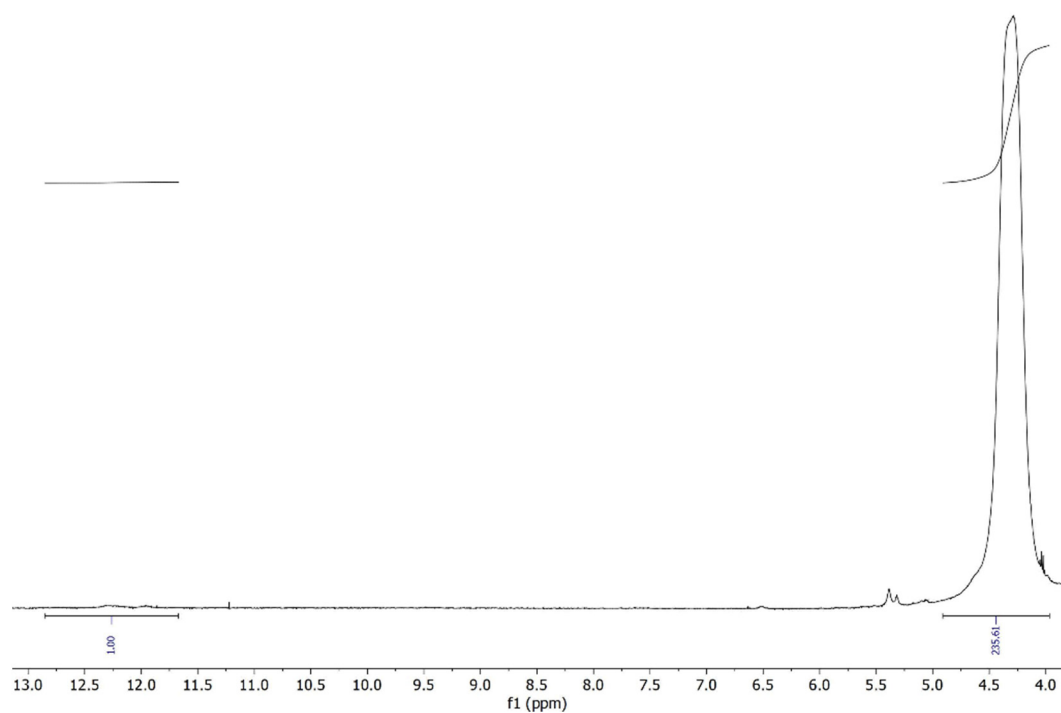

Figure S2 Carboxylic termination group signals in <sup>1</sup>H NMR spectrum of PNVCL\_305 dissolved in d<sub>6</sub>-DMSO.

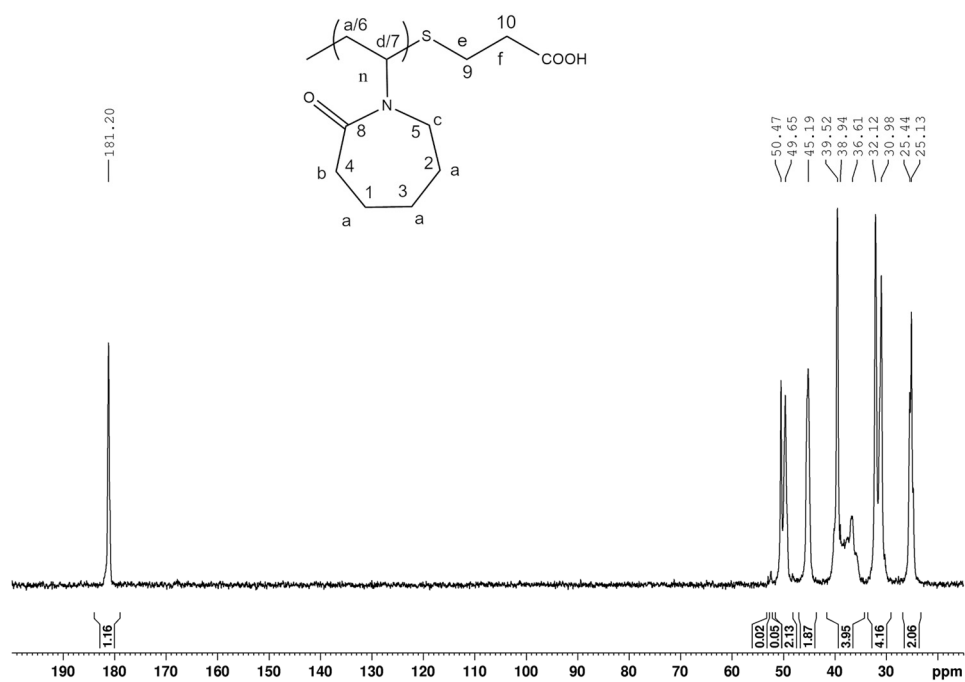

Figure S3 <sup>13</sup>C spectrum of PNVCL\_122.

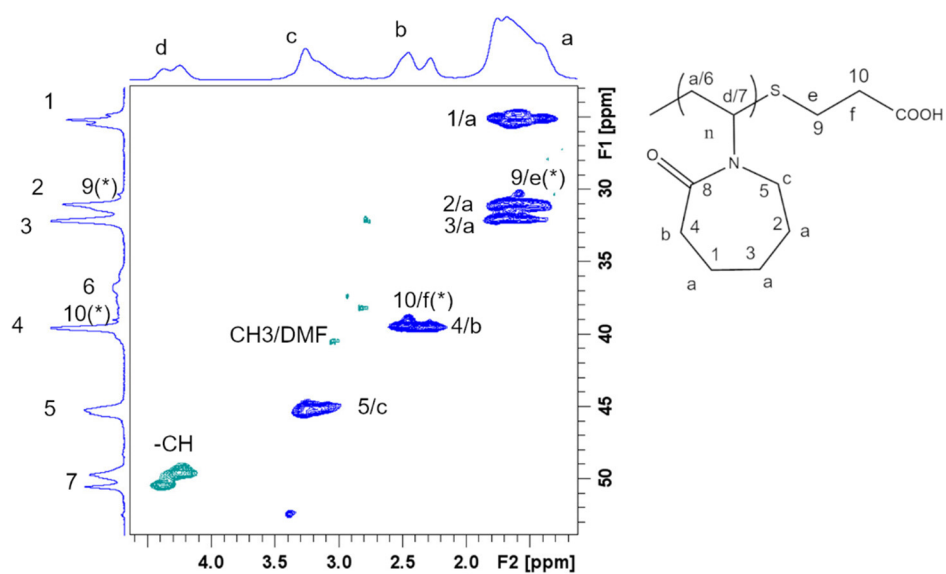

Figure S4 HSQC-DEPT spectrum of PNVCL<sub>122</sub>.

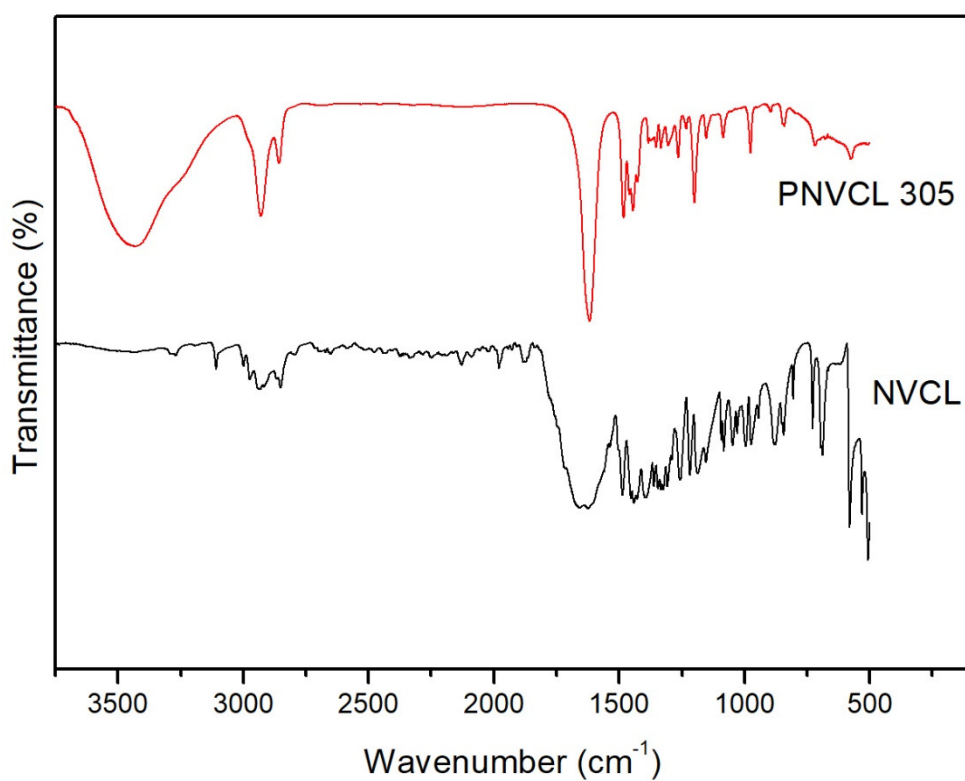

Figure S5 Comparison between NVCL and PNVCL-COOH spectrum (PNVCL<sub>305</sub>).

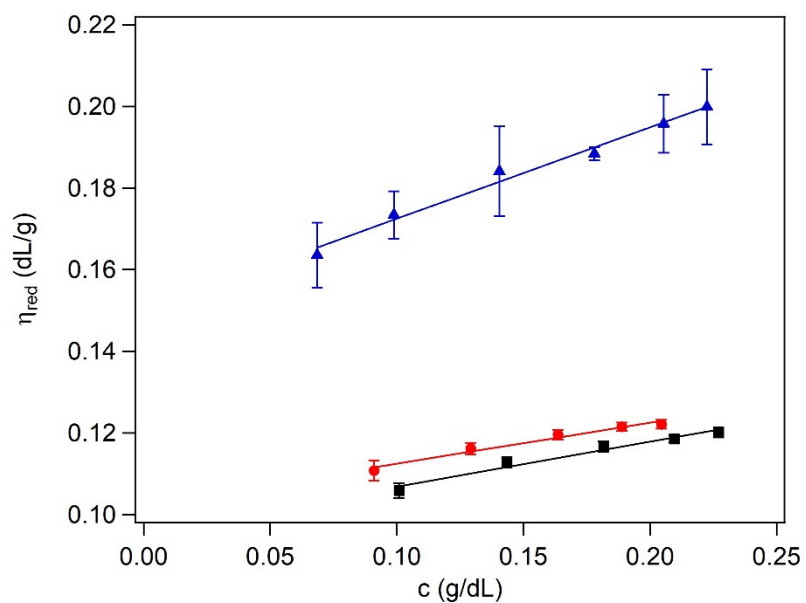

Figure S6 Reduced viscosity reported as a function of PNVC\_244 (black squares), PNVC\_305 (red circles) and PNVC\_1220 (blue triangles) concentration. The value of  $\eta_{red}$  were calculated according to the Huggins method by using the calibration lines reported in the figure.

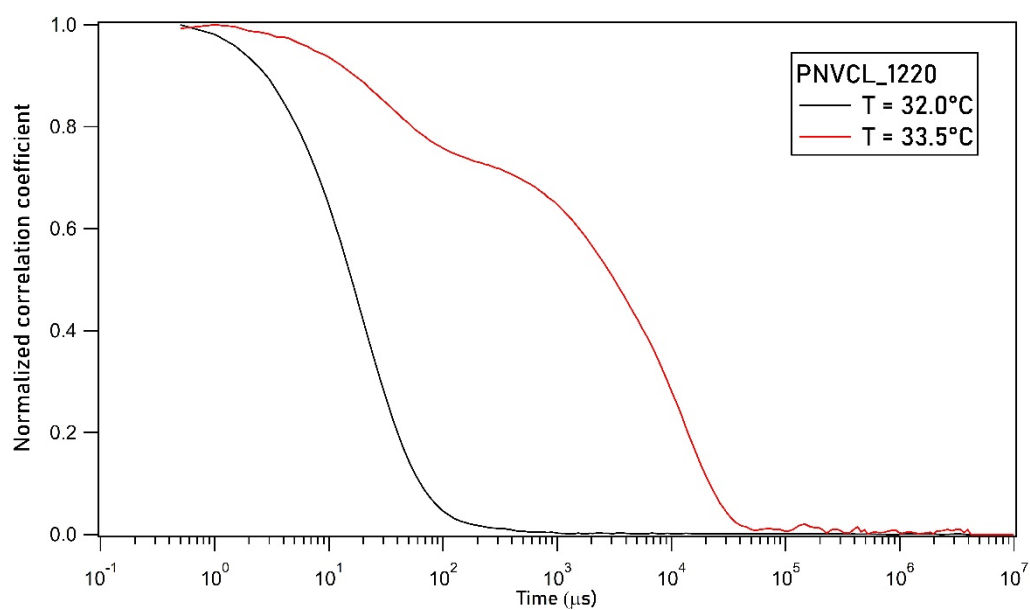

Figure S7 Displacement of the correlation curve of PNVC\_1220 solution (0.5 w%) associated to LCST transition.

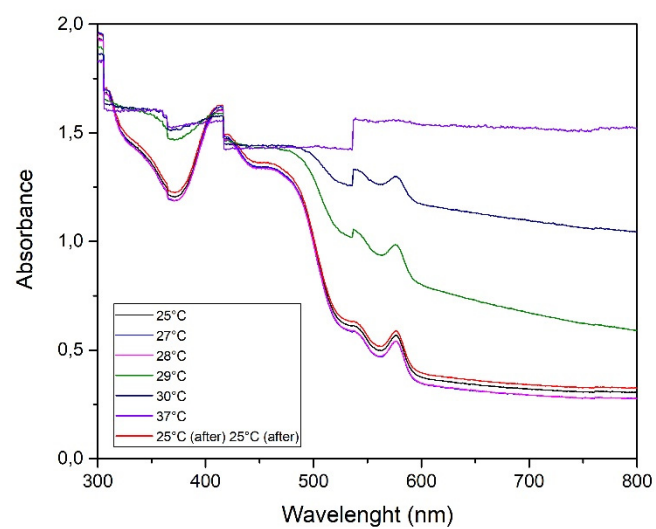

Figure S8 Variation of UV-VIS spectrum of a solution of PNVCL\_244 in human plasma (5mg/ml) with temperature.

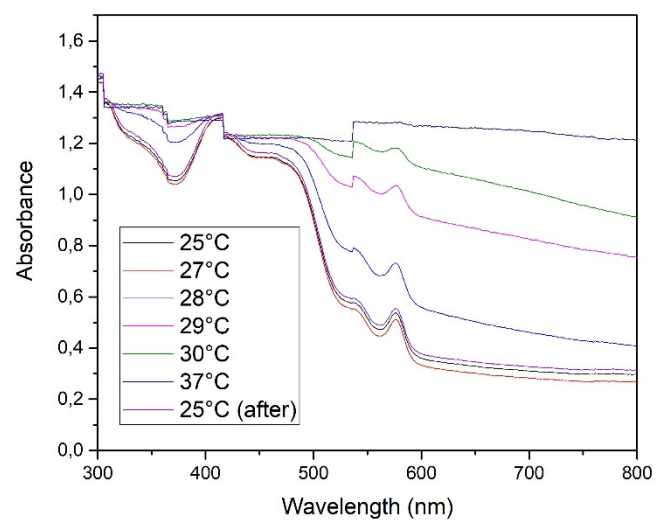

Figure S9 Variation of UV-VIS spectrum of a solution of PNVCL\_244 in human plasma (5mg/ml) with temperature.

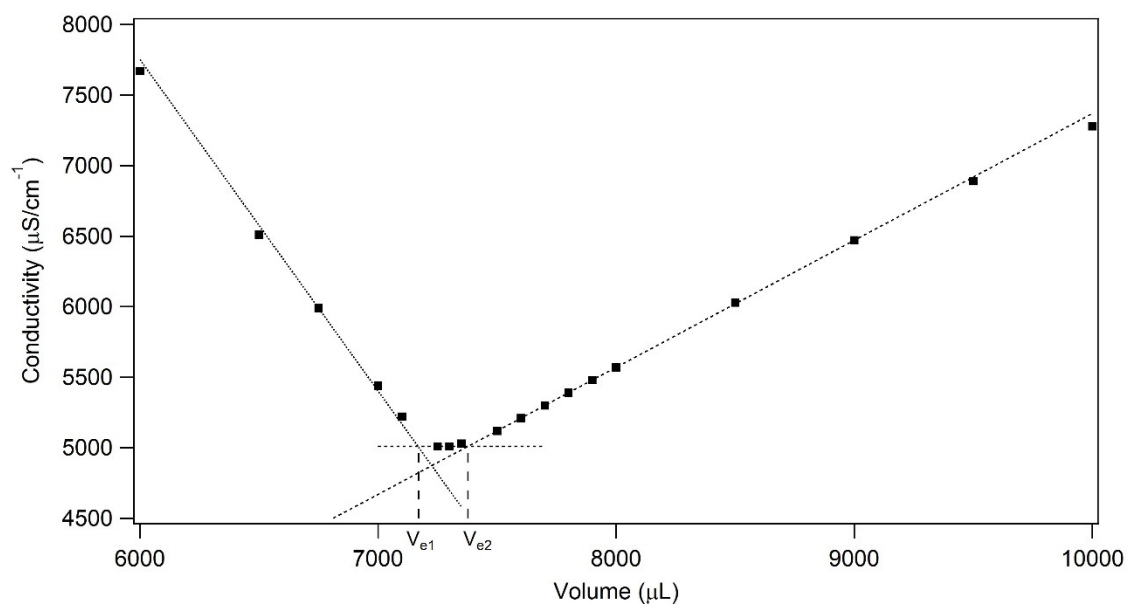

Figure S10 Conductimetric titration of PNVCL\_305.
